# Supplementary material
Source: MDPI journal article supplement (https://www.mdpi.com/2571-841X/4/2/17)
Supplement: s1 [file s1]

**Figure S1:** Immunofluorescence for IL-6 and TNF-  $\alpha$  in THLE-2 and Hep G2 cells. interleukin (IL)-6 (panels A, and D), tumor necrosis factor (TNF)-  $\alpha$  (panels G, and J), DAPI (panels B, E, H, and K), and merged images (panels C, F, I, and L).

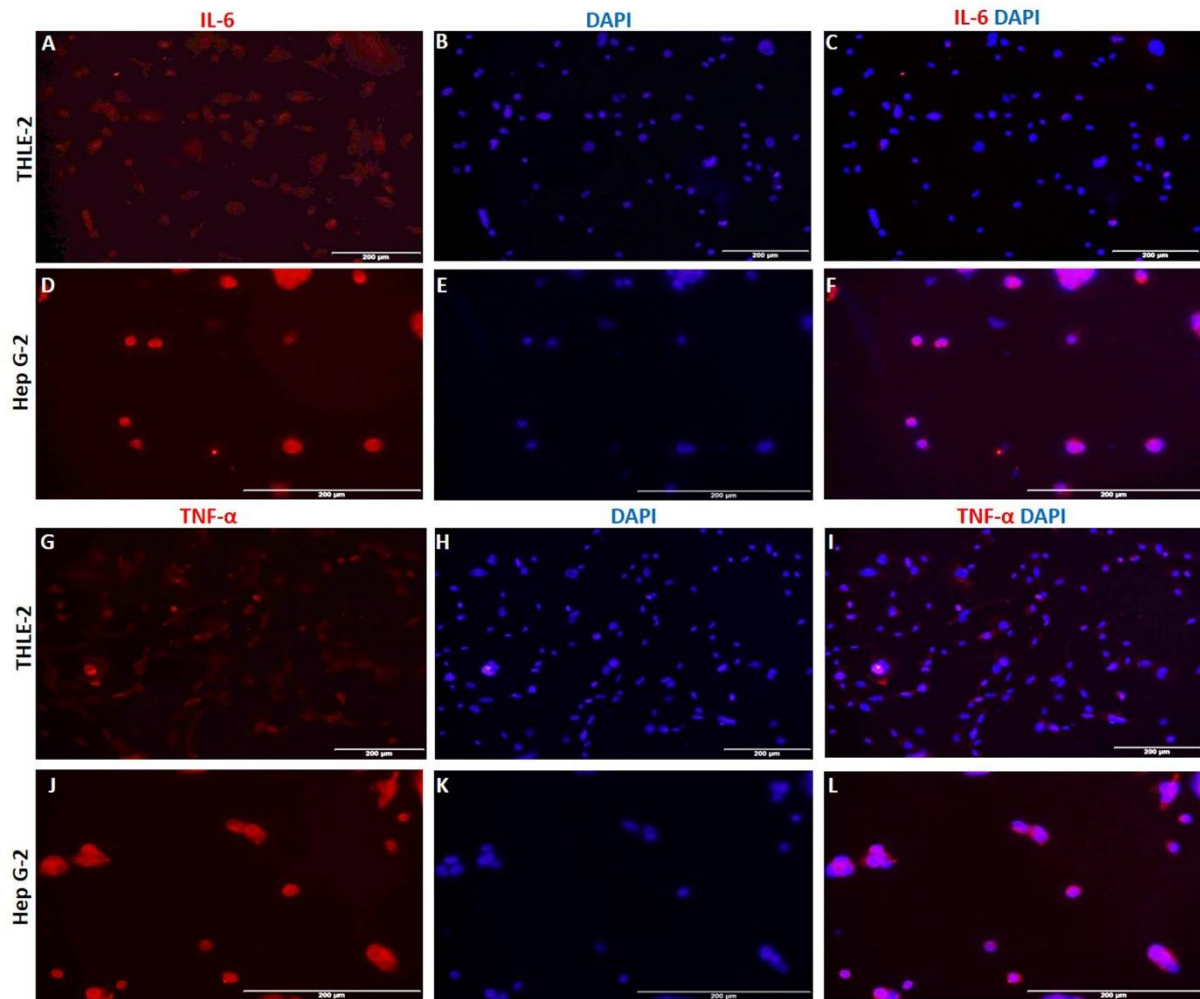

**Figure S2:** Immunofluorescence for vitamin D receptor (VDR; panels A and D), cyp24A1 (panels G and J), cyp27B1 (panels M and P), DAPI (panels B, E, H, K, N, and Q), and merged images (panels C, F, I, L, O, and R).

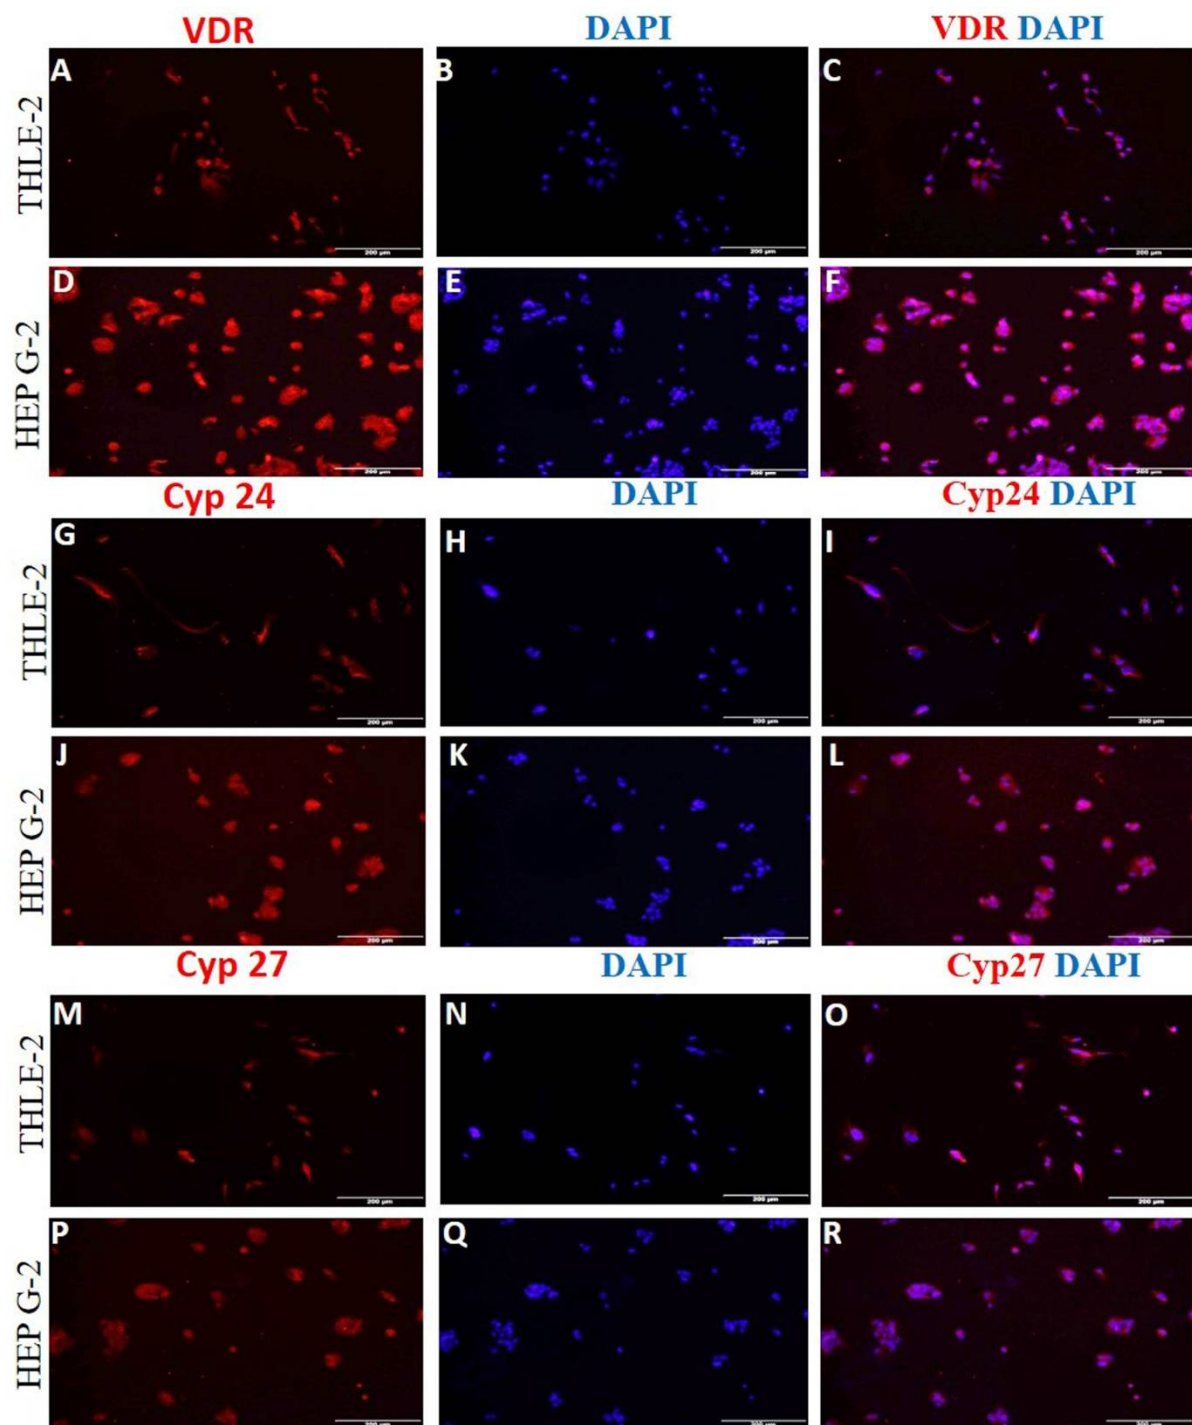

**Supplementary Table S1. Minimum and maximum absolute values for all parameters evaluated in this study**

| Figure 1 |                        | RT-PCR  |         | RT-PCR  |         | Immunofluorescence Intensity |         |         |         |
|----------|------------------------|---------|---------|---------|---------|------------------------------|---------|---------|---------|
|          |                        | TREM-1  |         | TREM-2  |         | TREM-1                       |         | TREM-2  |         |
|          |                        | Minimum | Maximum | Minimum | Maximum | Minimum                      | Maximum | Minimum | Maximum |
| THLE-2   | Control                | 0.6     | 1       | 1       | 1.48    | 23.06                        | 28.63   | 65.92   | 69.41   |
| HepG-2   | Control                | 1.13    | 1.62    | 0.55    | 0.84    | 61.63                        | 77.03   | 47.4    | 53.43   |
| HepG-2   | Vitamin D              | 0.43    | 0.6     | 5.24    | 7.89    | 30.36                        | 35.33   | 78.83   | 85.65   |
| HepG-2   | IL-6                   | 2.17    | 2.25    | 2.95    | 4.2     | 76.41                        | 83.72   | 62.36   | 66.34   |
| HepG-2   | IL-6 + Vit.D           | 0.58    | 0.71    | 3.12    | 4.99    | 35.6                         | 37.46   | 68.82   | 75.31   |
| HepG-2   | TNF- $\alpha$          | 1.75    | 2.53    | 1.77    | 2.81    | 74                           | 78.92   | 64.14   | 69.45   |
| HepG-2   | TNF- $\alpha$ + Vit. D | 1.3     | 1.51    | 1.84    | 2.81    | 51.2                         | 55.48   | 68.05   | 73.38   |
| Figure 4 |                        | RT-PCR  |         |         |         |                              |         |         |         |
|          |                        | TREM-1  |         | IL-6    |         | TNF- $\alpha$                |         |         |         |
|          |                        | Minimum | Maximum | Minimum | Maximum | Minimum                      | Maximum |         |         |
| THLE-2   | Control                | 0.42    | 1       | 0.64    | 1       | 0.76                         | 1       |         |         |
|          | C + rHMGB-1            | 2.07    | 2.86    | 3.89    | 4.5     | 1.12                         | 1.59    |         |         |
| HepG2    | Control                | 0.52    | 1       | 0.5     | 1       | 0.44                         | 1       |         |         |
|          | C + rHMGB-1            | 1.22    | 1.94    | 1.64    | 2.95    | 1.52                         | 2.71    |         |         |

| Figure 5 |               | RT-PCR         |         |         |         |               |         |         |
|----------|---------------|----------------|---------|---------|---------|---------------|---------|---------|
|          |               | NF- $\kappa$ B |         | PU.1    |         | TREM-1        |         |         |
|          |               | Minimum        | Maximum | Minimum | Maximum |               | Minimum | Maximum |
| HepG2    | Control       | 0.82           | 1       | 0.94    | 1.56    | Control       | 0.79    | 1.02    |
|          | Vitamin D     | 0.5            | 0.58    | 1.59    | 2.18    | LPS           | 3.12    | 4.24    |
|          | IL-6          | 2.9            | 3.92    | 0.23    | 0.28    | C siRNA       | 1.17    | 1.66    |
|          | IL-6 + Vit.D  | 1.2            | 1.81    | 0.35    | 0.51    | C siRNA+LPS   | 2.13    | 3.60    |
|          | TNF- $\alpha$ | 2.05           | 2.9     | 0.33    | 0.4     | PU.1 siRNA 40 | 1.44    | 1.75    |

|                                                                                                       |                        |                                      |         |         |         |                             |         |      |
|-------------------------------------------------------------------------------------------------------|------------------------|--------------------------------------|---------|---------|---------|-----------------------------|---------|------|
|                                                                                                       | TNF- $\alpha$ + Vit. D | 1.13                                 | 1.53    | 0.41    | 0.51    | PU.1 siRNA 80               | 2.99    | 4.53 |
|                                                                                                       | LPS                    | 2.87                                 | 4.17    | 4.81    | 5.24    | PU.1 siRNA 40+LPS           | 1.88    | 3.02 |
|                                                                                                       | LPS + Vit. D           | 1.08                                 | 1.6     | 1.87    | 3.24    | PU.1 siRNA 80+LPS           | 2.75    | 3.36 |
|                                                                                                       |                        |                                      |         |         |         | TREM-1 siRNA                | 0.16    | 0.32 |
|                                                                                                       |                        |                                      |         |         |         | PU.1 Plasmid 4              | 0.48    | 0.54 |
|                                                                                                       |                        |                                      |         |         |         | PU.1 Plasmid 10             | 0.22    | 0.32 |
|                                                                                                       |                        |                                      |         |         |         | PU.1 Plasmid 1              | 0.36    | 0.49 |
|                                                                                                       |                        |                                      |         |         |         | PU.1 Plasmid 2              | 0.41    | 0.61 |
|                                                                                                       |                        |                                      |         |         |         |                             |         |      |
| <b>Figure 6</b>                                                                                       |                        | RT-PCR                               |         |         |         | Mean Fluorescence Intensity |         |      |
|                                                                                                       |                        | TREM-1                               |         | TREM-2  |         | TREM-1                      |         |      |
|                                                                                                       |                        | Minimum                              | Maximum | Minimum | Maximum | Minimum                     | Maximum |      |
| HepG2                                                                                                 | Control                | 0.91                                 | 1.00    | 0.97    | 1.13    | 61.63                       | 77.03   |      |
|                                                                                                       | Vitamin D              | 0.51                                 | 0.59    | 3.73    | 4.24    | 30.36                       | 35.33   |      |
|                                                                                                       | LPS                    | 7.84                                 | 10.63   | 0.26    | 0.41    | 81.01                       | 92.07   |      |
|                                                                                                       | LPS + Vit. D           | 4.41                                 | 4.70    | 1.65    | 2.79    | 35.05                       | 48.91   |      |
|                                                                                                       | PU.1                   |                                      |         |         |         | 58.16                       | 63.66   |      |
|                                                                                                       | LPS + PU.1             |                                      |         |         |         | 73.23                       | 80.18   |      |
| <b>Figure 7</b>                                                                                       |                        | Average area without cells (percent) |         |         |         |                             |         |      |
|                                                                                                       |                        | 24 hr                                |         | 48 hr   |         |                             |         |      |
|                                                                                                       |                        | Minimum                              | Maximum | Minimum | Maximum |                             |         |      |
| HepG2                                                                                                 | Control                | 49.62                                | 56.3    | 0       | 45.23   |                             |         |      |
|                                                                                                       | Vitamin D              | 68.62                                | 79.96   | 36.52   | 46.93   |                             |         |      |
|                                                                                                       | IL-6                   | 29.61                                | 47.73   | 0       | 21.53   |                             |         |      |
|                                                                                                       | IL-6 + Vit.D           | 54.89                                | 75      | 11.35   | 34.14   |                             |         |      |
|                                                                                                       | TNF- $\alpha$          | 42.97                                | 55.15   | 0       | 16.51   |                             |         |      |
|                                                                                                       | TNF- $\alpha$ + Vit. D | 52.46                                | 80.67   | 0       | 24.32   |                             |         |      |
| The area at 0hr was standardized to 100% and the area at 24 and 48 hours was calculated in percentage |                        |                                      |         |         |         |                             |         |      |
